# Supplementary material for: Exploring the Determinants of Suicidal Behavior: Conventional and Emergent Risk (DISCOVER): a feasibility study
Source: PubMed Central journal article supplement (PMC5154080; doi:10.1186/s40814-015-0012-4), 2015-05-09
Supplement: 40814_2015_12_MOESM1_ESM.pdf [file 40814_2015_12_MOESM1_ESM.pdf]

## Supplementary Appendix

**Table S1: Comparative Demographic Characteristics Between Cases and Control Group 1**

| Variable                                    | Case<br>(n = 51)         | Control 1<br>(n = 57)         | Effect                |                |
|---------------------------------------------|--------------------------|-------------------------------|-----------------------|----------------|
| <b>Continuous variables</b>                 |                          |                               | <b>MD (95%CI)</b>     | <b>P-value</b> |
| Age in years; mean (SD)                     | 43.2 (13.3)              | 45.3 (14.0)                   | -2.10 (-7.32 to 3.12) | 0.427          |
| BMI (kg/m <sup>2</sup> ); mean (SD)         | 28.3 (8.5)               | 28.7 (5.7)                    | -0.40 (-3.13 to 2.34) | 0.772          |
| <b>Binary variables</b>                     | <b>Case<br/>(n = 51)</b> | <b>Control 1<br/>(n = 57)</b> | <b>OR (95% CI)</b>    | <b>P-value</b> |
| Female; n (%)                               | 24 (47.1)                | 29 (50.9)                     | 0.86 (0.38 to 1.96)   | 0.705          |
| Never married; n (%)                        | 19 (37.3)                | 23 (40.4)                     | 0.88 (0.38 to 2.05)   | 0.844          |
| Completed college/university; n (%)         | 20 (39.3)                | 21 (36.8)                     | 1.11 (0.47 to 2.59)   | 0.844          |
| Currently employed; n (%)                   | 12 (23.5)                | 19 (33.9)                     | 0.62 (0.24 to 1.56)   | 0.293          |
| Annual income<30k/year; n (%)               | 20 (39.2)                | 21 (36.8)                     | 1.06 (0.66 to 1.72)   | 0.844          |
| Currently smoking; n (%)                    | 25 (49.0)                | 18 (31.6)                     | 2.08 (0.89 to 4.92)   | 0.078          |
| Family history of suicidal behaviour; n (%) | 20 (39.2)                | 16 (28.1)                     | 1.65 (0.68 to 4.01)   | 0.229          |

**Table S2: Comparative Demographic Characteristics Between Cases and Control Group 2**

| Variable                                    | Case<br>(n = 51)         | Control 2<br>(n = 71)         | Effect                | P              |
|---------------------------------------------|--------------------------|-------------------------------|-----------------------|----------------|
| <b>Continuous variables</b>                 |                          |                               | <b>MD (95%CI)</b>     | <b>P-value</b> |
| Age in years; mean (SD)                     | 43.2 (13.3)              | 46.7 (18.7)                   | -3.50 (-9.55 to 2.55) | 0.255          |
| BMI (kg/m <sup>2</sup> ); mean (SD)         | 28.3 (8.5)               | 28.3 (6.5)                    | 0.00 (-2.69 to 2.69)  | >0.999         |
| <b>Binary variables</b>                     | <b>Case<br/>(n = 51)</b> | <b>Control 2<br/>(n = 71)</b> | <b>OR (95% CI)</b>    | <b>P-value</b> |
| Female; n (%)                               | 24 (47.1)                | 34 (47.9)                     | 0.97 (0.44 to 2.11)   | >0.999         |
| Never married; n (%)                        | 19 (37.3)                | 22 (31.0)                     | 1.32 (0.58 to 3.02)   | 0.561          |
| Completed college/university; n (%)         | 20 (37.3)                | 41 (57.7)                     | 0.47 (0.21 to 1.05)   | 0.066          |
| Currently employed; n (%)                   | 12 (23.5)                | 39 (54.9)                     | 0.25 (0.10 to 0.60)   | <0.001         |
| Annual income<30k/year; n (%)               | 20 (39.2)                | 12 (16.9)                     | 3.17 (1.27 to 8.06)   | 0.007          |
| Currently smoking; n (%)                    | 25 (49.0)                | 10 (14.1)                     | 5.87 (2.29 to 15.53)  | <0.001         |
| Family history of suicidal behaviour; n (%) | 20 (39.2)                | 17 (23.9)                     | 2.05 (0.87 to 4.83)   | 0.072          |

Supplementary analyses were conducted using WINPEPI

Abramson, J.H. WINPEPI updated: computer programs for epidemiologists, and their teaching potential. *Epidemiologic Perspectives & Innovations*. 2011, 8:1
